# Supplementary material
Source: HighWire-hosted journal article supplement (https://nutrition.bmj.com/content/bmjnph-2021-000250)

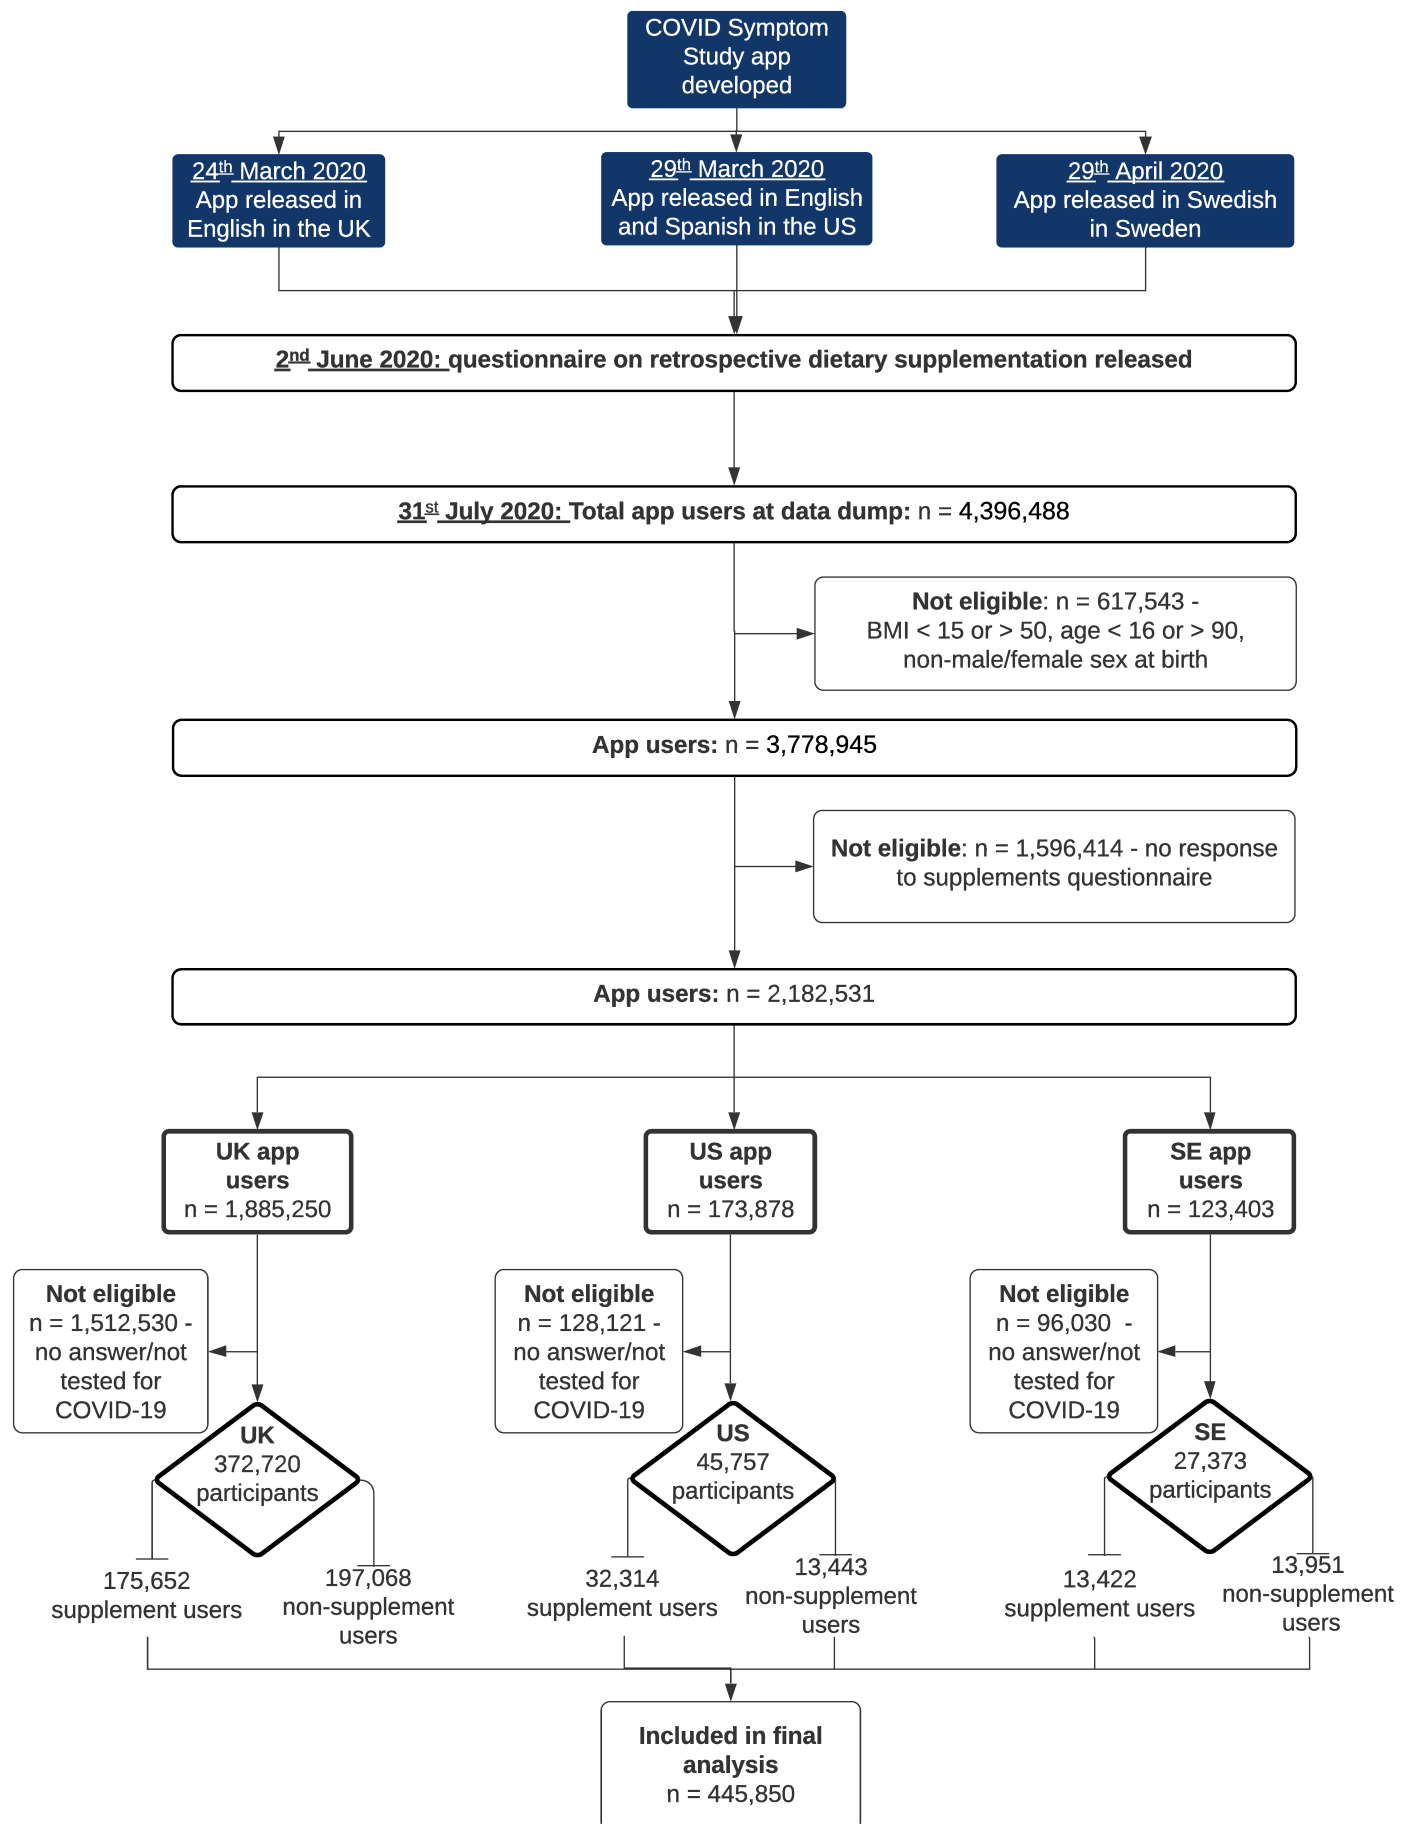

Supplement: inline-supplementary-material-1 [file inline-supplementary-material-1.pdf]
